# Supplementary material for: The Integration of Reference Electrode for ISFET Ion Sensors Using Fluorothiophenol-Treated rGO
Source: MDPI journal article supplement (doi:10.3390/bios13010089), 2023-01-05
Supplement: s1 [file s1]

## Supporting information

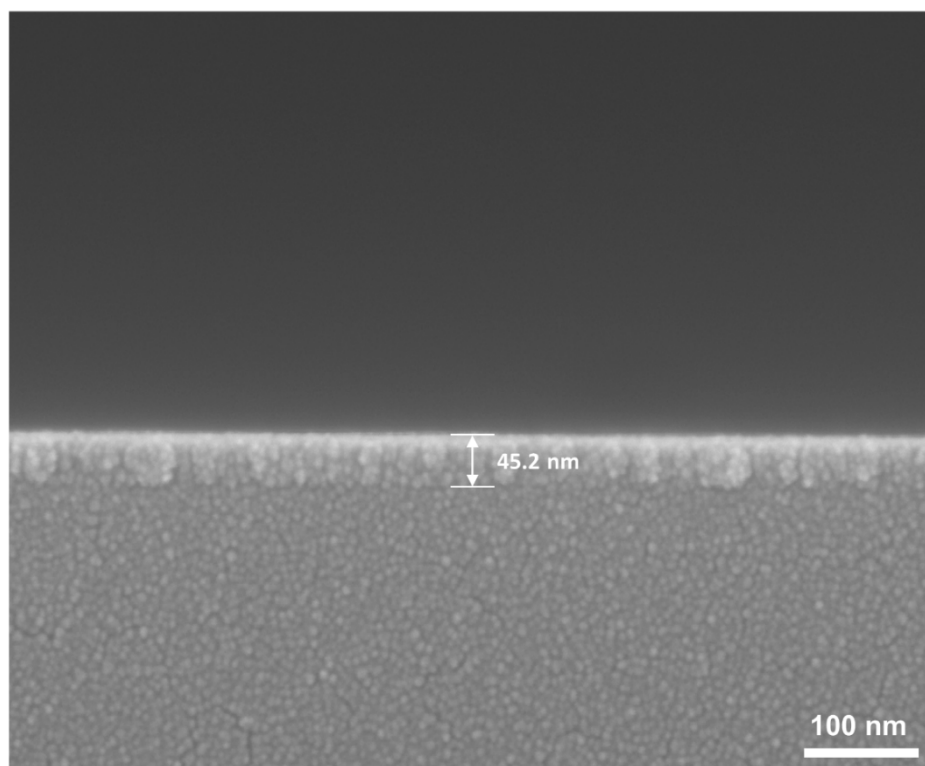

**Figure S1.** The FE-SEM image of the ITO thin film on Si/SiO<sub>2</sub> substrate.

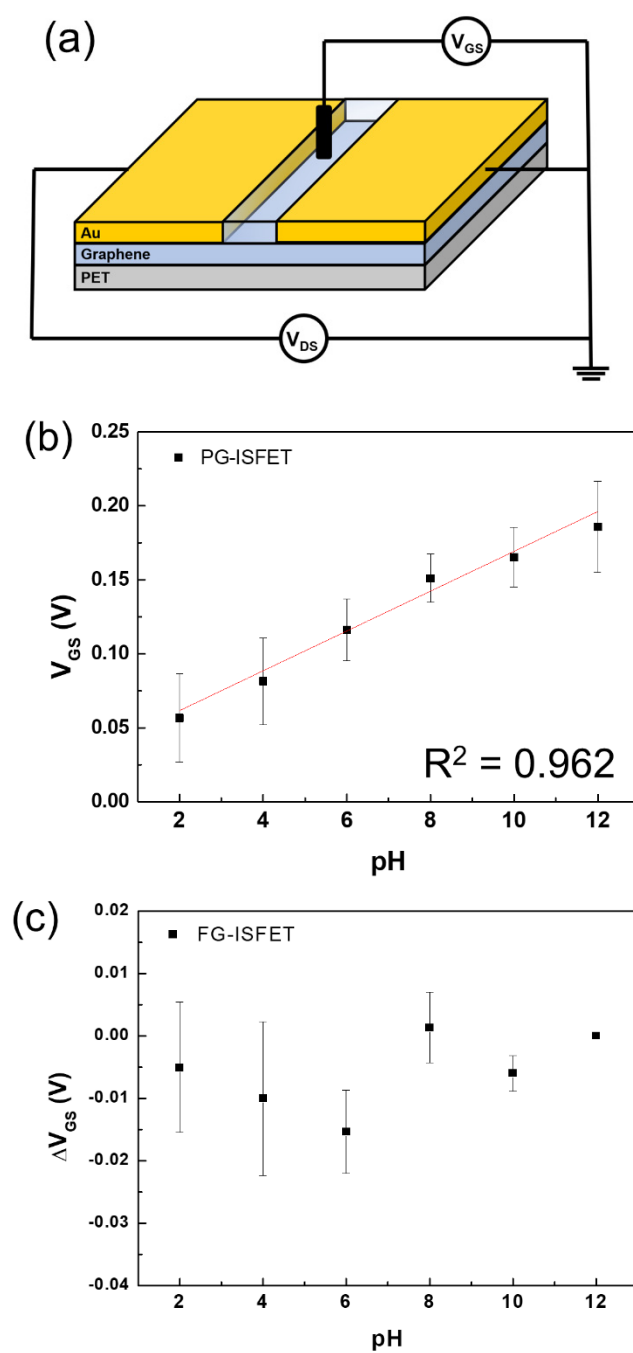

Figure S2. (a) Schematic diagram of the experiment. pH sensitivity of (b) the pristine graphene ion sensitive field-effect transistor (PG-ISFET) and (c) fluorinated graphene ion sensitive field-effect transistor (FG-ISFET) with Ag/AgCl RE in the pH buffer solution.

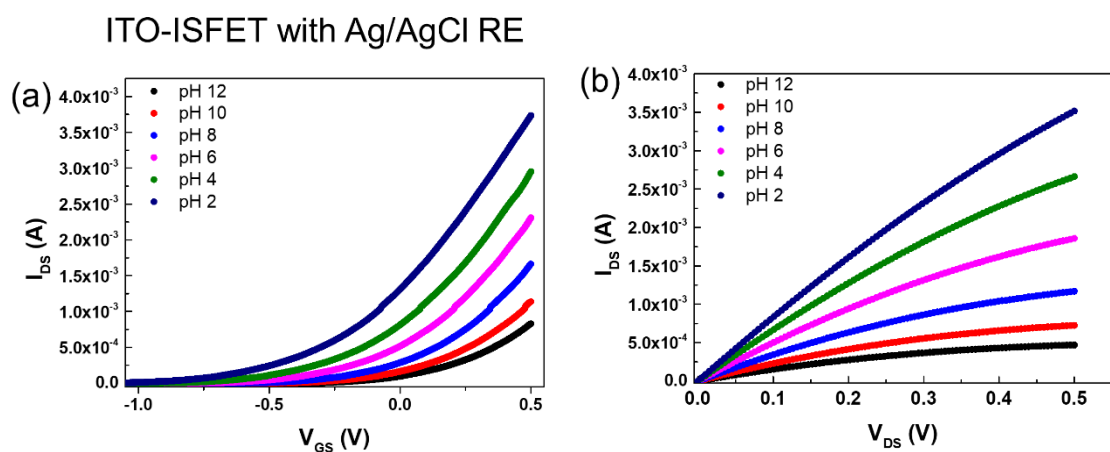

**Figure S3.**  $I_{DS}$ - $V_{GS}$  and  $I_{DS}$ - $V_{DS}$  transfer characteristics of the ITO-ISFET with Ag/AgCl RE in the pH buffer solution.

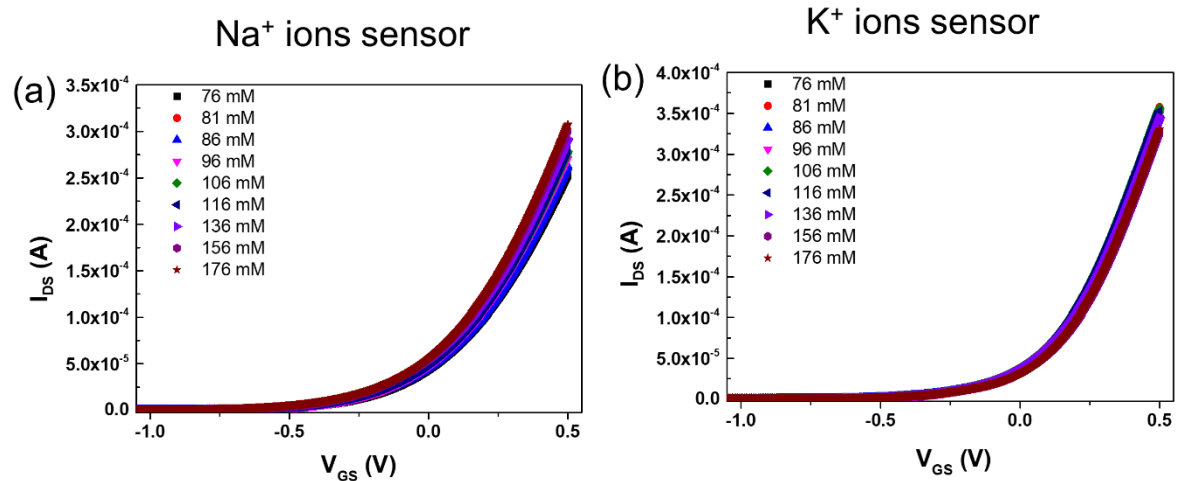

**Figure S4.** Detection of Na<sup>+</sup>, K<sup>+</sup> ions using ITO-ISFET-ISM with F-rGO RE sensors in patient urine samples with varying Na<sup>+</sup> ion concentrations. The sensitivities of Na<sup>+</sup> ion sensor (a) and K<sup>+</sup> ion sensor (b).

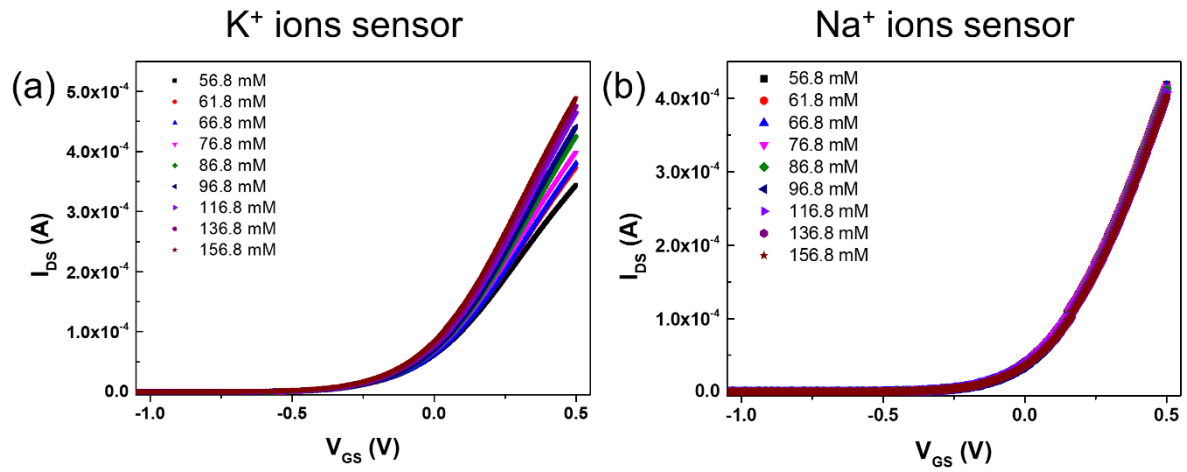

**Figure S5. Detection of Na<sup>+</sup>, K<sup>+</sup> ions using ITO-ISFET-ISM with F-rGO RE sensors in patient urine samples with varying K<sup>+</sup> ion concentrations. The sensitivities of K<sup>+</sup> ion sensor (a) and Na<sup>+</sup> ion sensor (b).**

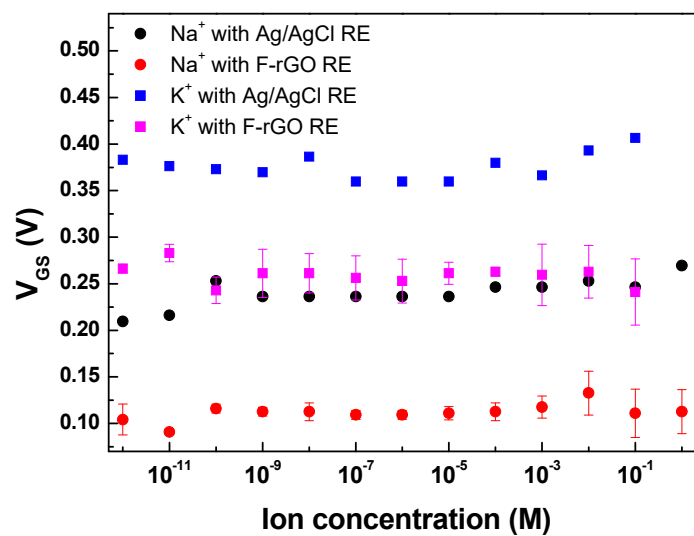

Figure S6. The Stability comparison of Ag/AgCl reference electrode and F-rGO reference electrode in solution A and solution B.
